# Supplementary material for: Carbon encapsulated 3D hierarchical Fe3O4spheres as advanced anode materials with long cycle lifetimes for lithium-ion batteries
Source: Royal Society of Chemistry journal article supplement (doi:10.1039/c4ta01511h), 2014-01-01
Supplement: c4ta01511h1.pdf [file c4ta01511h1.pdf]

## Supplementary Information

### Carbon encapsulated 3D hierarchical $\text{Fe}_3\text{O}_4$ spheres as an advanced anode material with long cycle lifetimes for lithium-ion batteries

Xiulin Fan, Jie Shao, Xuezhong Xiao, Lixin Chen,\* Xinhua Wang, Shouquan Li, Hongwei Ge

*State Key Laboratory of Silicon Materials, Key Laboratory of Advanced Materials and Application for Batteries of Zhejiang Province, Department of Materials Science and Engineering, Zhejiang University, Hangzhou 310027, PR China*

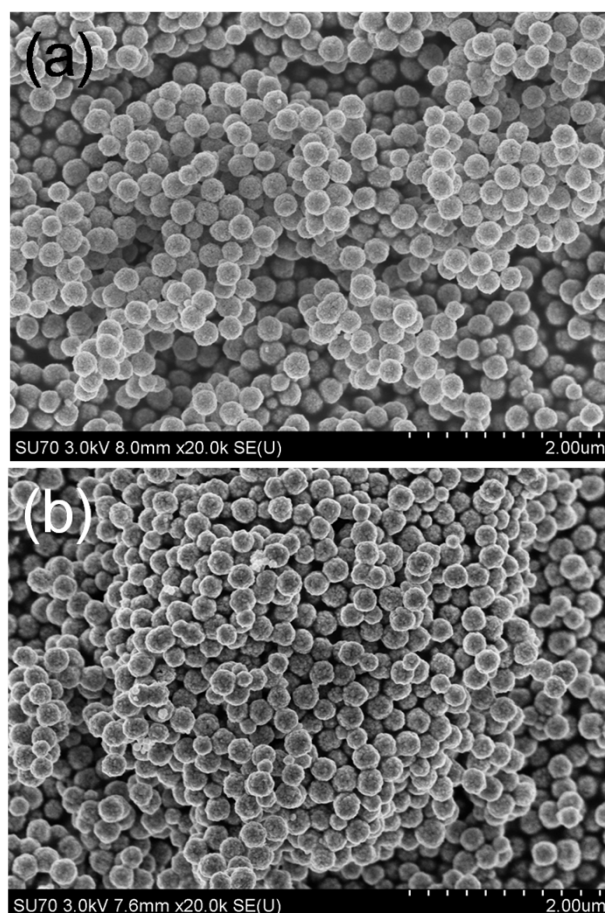

Figure S1 SEM images of  $\text{Fe}_3\text{O}_4$  (a) and  $\text{Fe}_3\text{O}_4@\text{C}$  (b) spheres.

---

\* To whom correspondence should be addressed.

E-mail address: [lxchen@zju.edu.cn](mailto:lxchen@zju.edu.cn) (L.X. Chen)

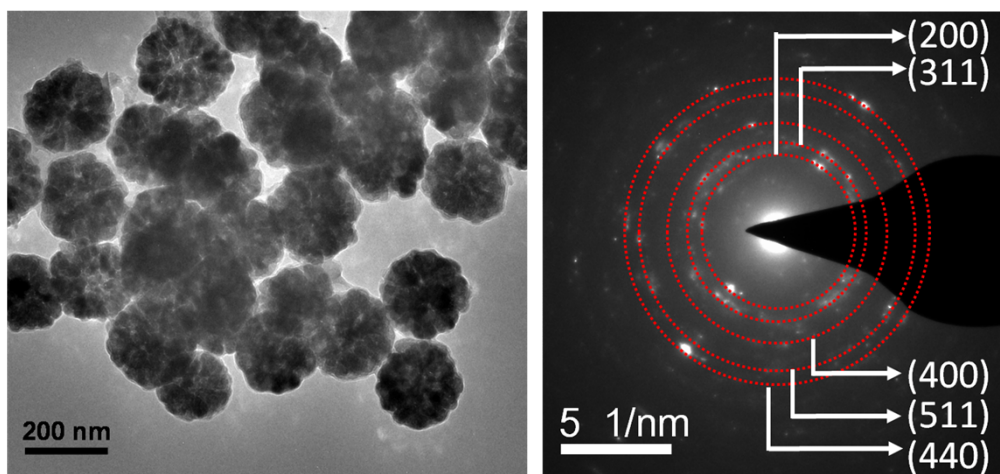

Figure S2 TEM image for the hybrid  $\text{Fe}_3\text{O}_4@\text{C}$  spheres (a) and corresponding SAED patterns (b).

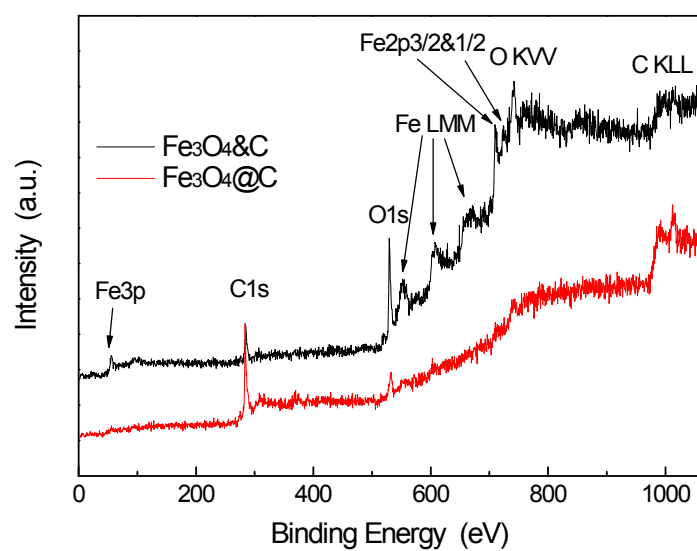

Figure S3. XPS survey scans of mixture of  $\text{Fe}_3\text{O}_4$  nanospheres with graphite (weight, 89:11) and as-prepared hybrid  $\text{Fe}_3\text{O}_4@\text{C}$  composite.

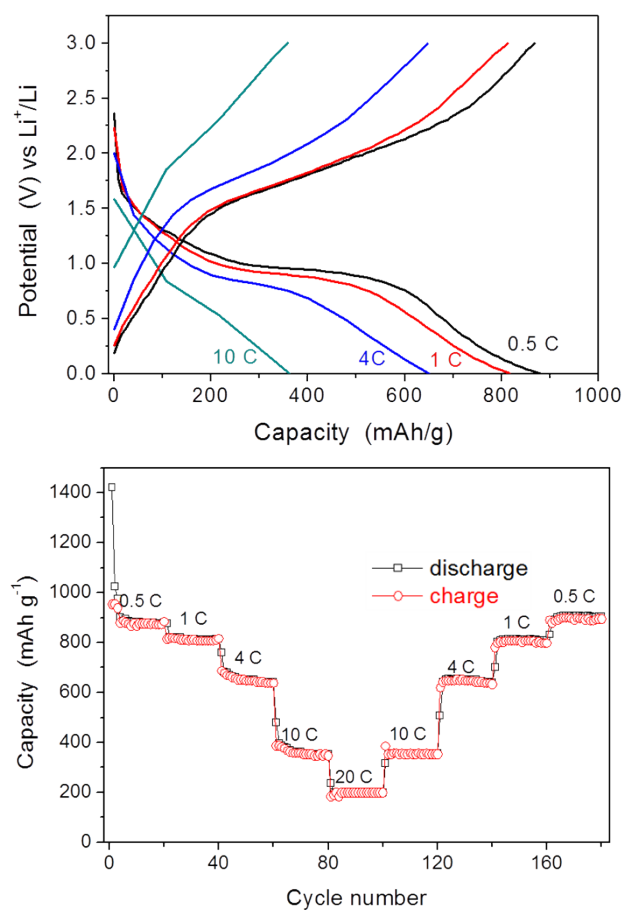

Figure S4. Charge/discharge rate properties of hybrid  $\text{Fe}_3\text{O}_4@\text{C}$  electrode.

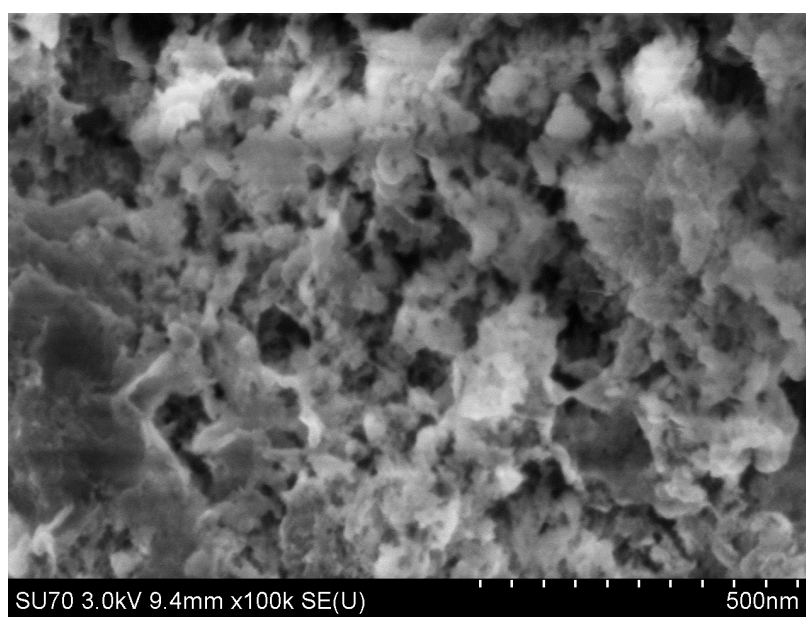

Figure S5. SEM image for bare  $\text{Fe}_3\text{O}_4$  sphere electrode after 50<sup>th</sup> cycles.

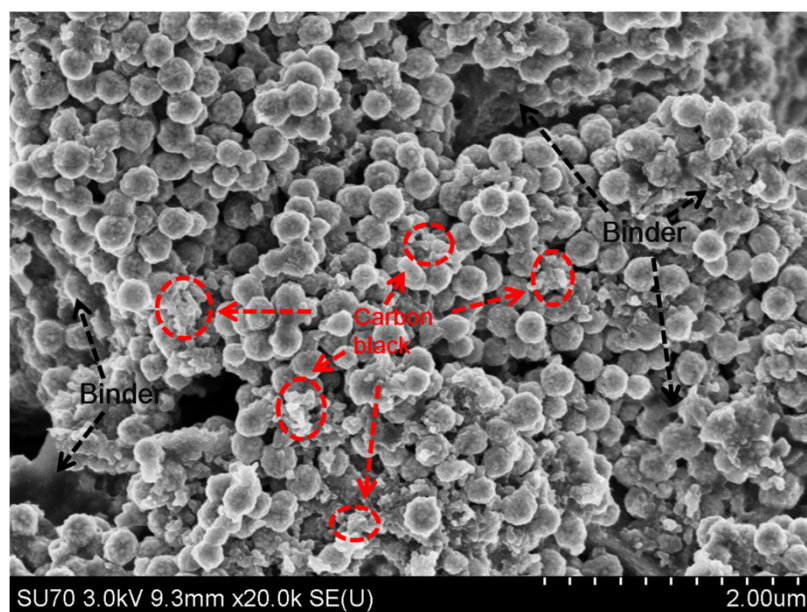

Figure S6 SEM image of the  $\text{Fe}_3\text{O}_4@\text{C}$  electrode in the charged state after 10<sup>th</sup> cycle.

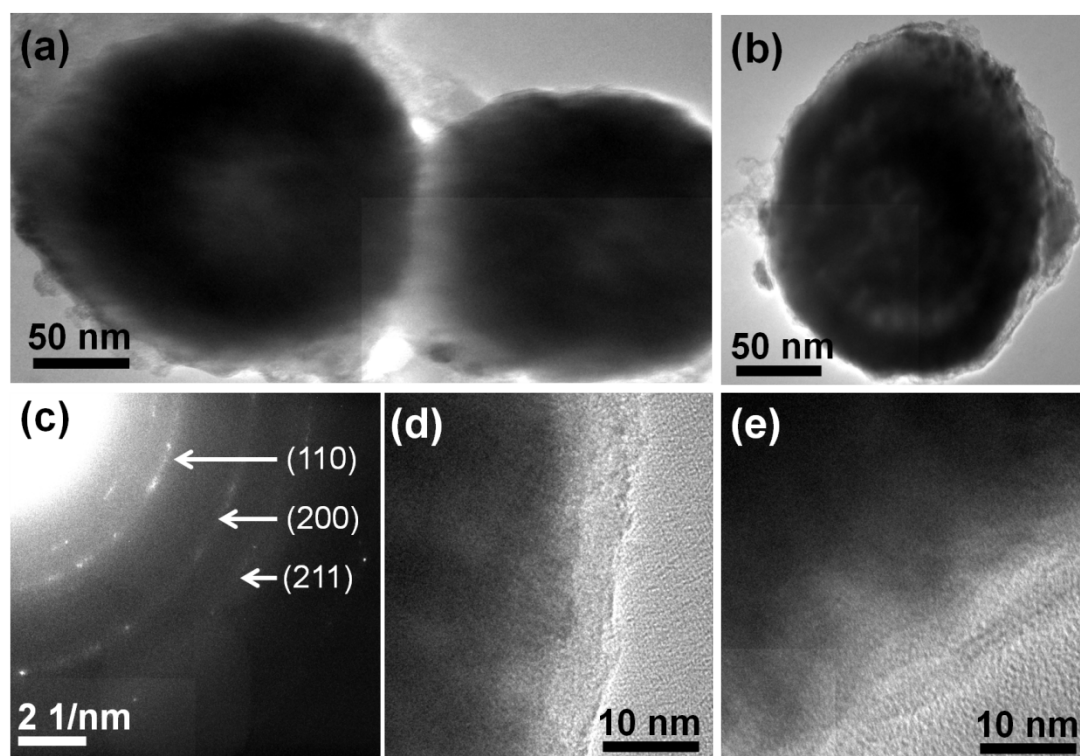

Figure S7 TEM image and the corresponding SAED pattern of the  $\text{Fe}_3\text{O}_4@\text{C}$  electrode in the charged state after 10<sup>th</sup> cycle.

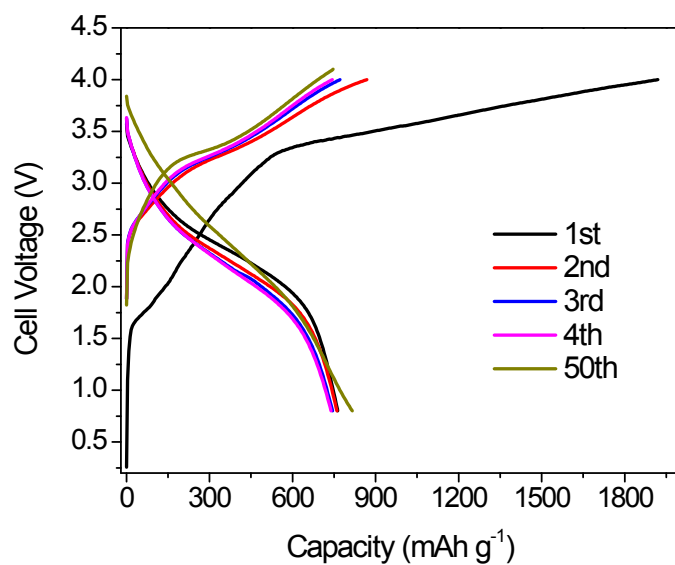

Figure S8 Charge-discharge curves for the full-cell battery with the commercial cathode of  $\text{LiMn}_2\text{O}_4$  and the as-prepared  $\text{Fe}_3\text{O}_4@\text{C}$  as anode
